# Supplementary material
Source: HighWire-hosted journal article supplement (https://www.rcpjournals.org/highwire/filestream/7159/field_highwire_adjunct_files/0/CMJ1506-errata-rogstad.pdf)
Supplement: CMJ1506-errata-rogstad.pdf [file CMJ1506-errata-rogstad.pdf]

## Sexual health issues in adolescents and young adults

**Authors:** Sophie Forsyth<sup>A</sup> and Karen Rogstad<sup>B</sup>

**Authors:** <sup>A</sup>consultant, Great Western Hospitals NHS Foundation Trust, Swindon, UK; <sup>B</sup>consultant in HIV and sexual health and undergraduate sub-dean, Sheffield Teaching Hospitals NHS Foundation Trust; on behalf of the BASHH Adolescent Special Interest Group

*Clinical Medicine* 2015;15:447–51.

The affiliations were listed in the incorrect order. The correct affiliation list is printed above.
